# Supplementary material for: Alpha-Thalassemia in Southern Italy: Characterization of Five New Deletions Removing the Alpha-Globin Gene Cluster
Source: MDPI journal article supplement (doi:10.3390/ijms24032577), 2023-01-30
Supplement: s1 [file s1]

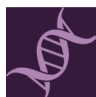

# Alpha-thalassemia in Southern Italy: characterization of five new deletions removing the alpha-globin gene cluster

Giovanna Cardiero <sup>1</sup>, Gennaro Musollino <sup>1</sup>, Romeo Prezioso <sup>1</sup>, Vincenzo Nigro <sup>2,3</sup>, Giuseppina Lacerra <sup>1,\*</sup>

<sup>1</sup> Istituto di Genetica e Biofisica “Adriano Buzzati Traverso” (IGB-CNR), Consiglio Nazionale delle Ricerche, 80125 Napoli,

<sup>2</sup> Department of Precision Medicine, University of Campania L. Vanvitelli, Naples, Italy,

<sup>3</sup> Telethon Institute of Genetics and Medicine (TIGEM), Pozzuoli (NA, Italy),

\* Correspondence: giuseppina.lacerra@igb.cnr.it

## Supplementary material

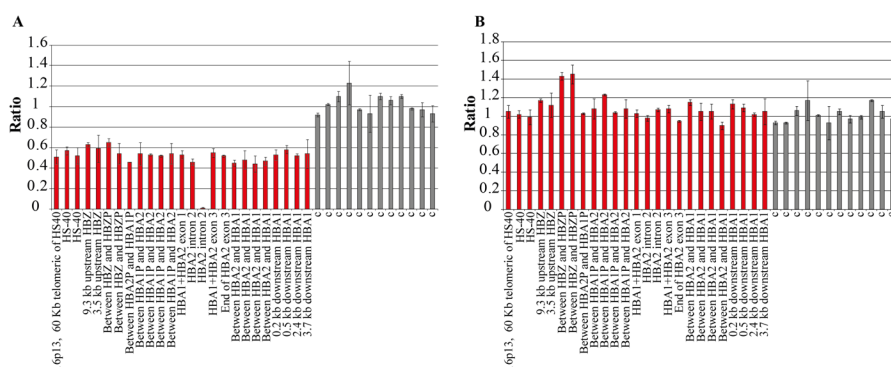

**Figure S1. MLPA pattern of the family 6 with the deletion --AG.** A) The father ( $\alpha\alpha/--AG$ ) show the reduction of level of all the 25 MLPA probed; B) the mother showed the duplication of the zeta gene; The son (Fig 2E), compound heterozygotes for the --AG deletion and for the duplication of the zeta gene, showed the deletion of 23/25 MLPA probes and normal level of the 6 and 7 probes.

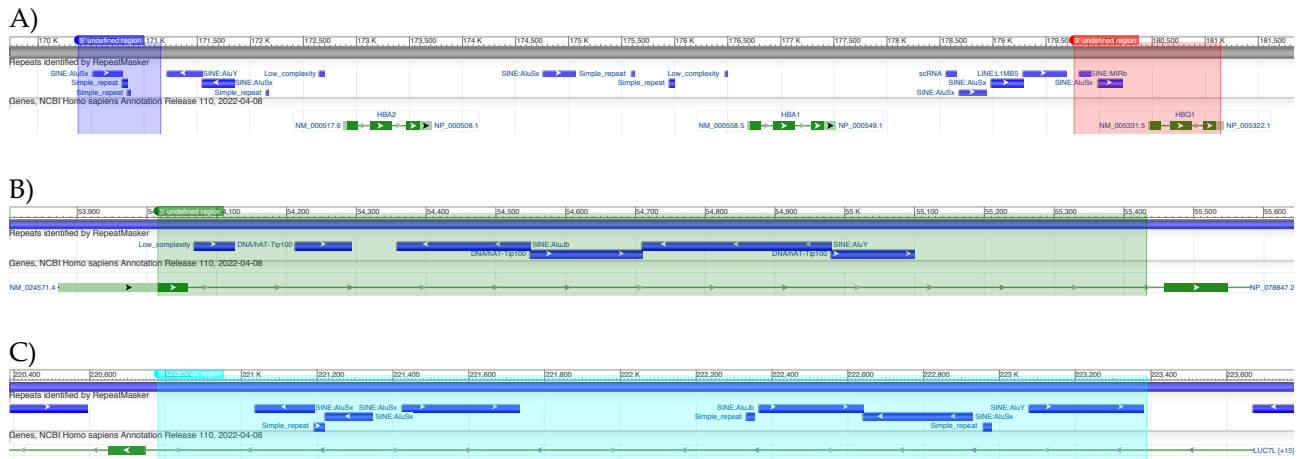

**Figure S2. Repetitive elements present in the 5' and 3' undefined regions of the --Puglia and --Sciacca  $\alpha$ -thalassemia deletions.** A) The 5' and 3' undefined region of the --Sciacca contain respectively the following repeats: in 5' SINE: AluSx and 2 Simple repeats; in the 3' SINE: MIRb and SINE: AluSx. The regions, where the breakpoints could be located, are highlighted. B) The 5' undefined region of the --Puglia contains the following repeats: low complexity, DNA/hAT-Tip 100, SINE: AluJb, DNA/hAT-Tip 100, SINE: Alu Y, DNA/hAT-Tip 100. C) The 3' undefined region of the --Puglia contains the following repeat: SINE: AluSx, Simple Repeat, SINE: AluSx, SINE: AluSx, Simple Repeat, SINE: AluJb, SINE:AluSx, Simple Repeat, SINE: AluY.

Table S1. Primers and positions of amplicons for quantitative real time PCR. Primer positions are according to reference sequence NC\_000016.10 and NC\_000015.10.

| n.     | Oligo forward             | Position on<br>Chr 16 | bp | n.     | Oligo reverse                 | Position on<br>Chr 16 | bp | Fragments<br>length (bp) |
|--------|---------------------------|-----------------------|----|--------|-------------------------------|-----------------------|----|--------------------------|
|        |                           |                       |    |        |                               |                       |    |                          |
| 1-for  | GGAATCTGGGAGACCTGTGA      | 48298-48318           | 20 | 1-rev  | CCTTCAGCTGGATTTGAGAAGAAC      | 48379-48356           | 23 | 82                       |
| 2-for  | CAGTGGCATCAACAGCCTCAT     | 51495-51515           | 20 | 2-rev  | ACTCTACTGCAGGTAAGAGGGGAAAAC   | 51569-51543           | 26 | 75                       |
| 3-for  | AAGAGGAAGATGAGGACGAAGAAGA | 53943-53967           | 24 | 3-rev  | GCCAGACCCTCTGGAACA            | 54015-53997           | 18 | 73                       |
| 4-for  | CCACTTCTGCCCTTGGTCTTT     | 55433-55453           | 20 | 4-rev  | CCTGGCCGTATTCTAGGGCTAT        | 55507-55486           | 21 | 75                       |
| 5-for  | TTTGACAGCTGGCTGGTTGA      | 84303-84322           | 19 | 5-rev  | GGGCGAGCACTAGTGGACAA          | 84378-84359           | 19 | 76                       |
| 6-for  | CTGGCCATAAGAAGGAGGTAA     | 110480-110502         | 22 | 6-rev  | GGGACCTCAAGGAAGCTTATGAC       | 110549-110527         | 22 | 70                       |
| 7-for  | CAGTGTGGCAGCGTTGAGA       | 146054-146073         | 19 | 7-rev  | CCATGACAACCTATTAATCCATTCC     | 146146-146122         | 24 | 93                       |
| 8-for  | CCAGACAGACACAAATGAGAGCAT  | 148063-148086         | 23 | 8-rev  | CTTTGGTTGTTTTGCCTGCTT         | 148138-148117         | 21 | 76                       |
| 9-for  | TCCCCTGCATCCCTTTTTCAG     | 171090-171109         | 19 | 9-rev  | TAGTAATAATCAGTGAGACTGTGGAATGG | 171157-171129         | 28 | 68                       |
| 10-for | GCACCGTGCTGACCTCCAAA      | 173572-173591         | 19 | 10-rev | CCCATCGGGCAGGAGGAA            | 173637-173620         | 17 | 66                       |
| 11-for | CCTCTGCCTGCGTTTGTGAT      | 178415-178434         | 19 | 11-rev | AGACACCGCTTCTCTGACAGTTG       | 178486-178464         | 22 | 72                       |
| 12-for | CGACCTTCCCCGTGTTTG        | 181140-181159         | 19 | 12-rev | CGAGAGAGCACGGCAAGAA           | 181201-181183         | 18 | 62                       |
| 13-for | GTGGACACCCTCCTGGGATT      | 183212-183231         | 20 | 13-rev | TCTGCACCTCTGGGTAGGTTCT        | 183359-183338         | 22 | 148                      |
| 14-for | GGCCGAGGACACTGATGCT       | 185599-185618         | 19 | 14-rev | CATCCTGTCCCCCGTGTCT           | 185673-185655         | 18 | 75                       |
| 15-for | GTGCCCTGCCATCTACTGGAT     | 188850-188870         | 20 | 15-rev | CACCAGCACCTCACAGAAACC         | 188926-188906         | 20 | 77                       |
| 16-for | CCACAAGGGCACGGAAGTA       | 195009-195028         | 19 | 16-rev | CAGGATGAGCATGGGTGAAAGT        | 195084-195063         | 21 | 76                       |
| 17-for | AAGTGTAAGTGGCACCAGAGTG    | 199102-199124         | 22 | 17-rev | GCCTACCTTGGTCTCCATGACA        | 199166-199145         | 21 | 65                       |
| 18-for | GCATCCTTACTGCCAGCATTG     | 206281-206301         | 20 | 18-rev | ACAAAGGTGCCACTGGTTTCAT        | 206355-206334         | 21 | 75                       |
| 19-for | CACAGGCCGGTGGTCACT        | 211889-211908         | 19 | 19-rev | CAGCACAAGGGCACCTGTCT          | 211969-211950         | 19 | 81                       |
| 20-for | AGGGCCAAGTCGTGGATTTT      | 220704-220723         | 19 | 20-rev | TGAGGTCTGCATTTTCTGTTTCTTT     | 220779-220755         | 24 | 76                       |
| 21-for | AGCACGTGGCATACTACTAACAAA  | 223389-223413         | 24 | 21-rev | CACCATACAAGGCAGACCCGT         | 223483-223463         | 20 | 95                       |
| 22-for | CACTGAGGATAGGCTTGGGTCT    | 224913-224935         | 22 | 22-rev | CCAGGGGAATGGCCAGTAGTAT        | 225011-224990         | 21 | 99                       |
| 23-for | TGTGACTACGGCTCGATGA       | 228323-228342         | 20 | 23-rev | TCAGTGTATCTTTGCCTGCCTACA      | 228400-228377         | 24 | 78                       |
| 24-for | GGCGGGACCTATGGAAAGAA      | 231423-231442         | 19 | 24-rev | CGTGTGGTACACGTACAAATATGACA    | 231551-231526         | 25 | 129                      |
| 25-for | GCCGAGGTGCTCGTCTGT        | 235383-235402         | 19 | 25-rev | CCCAGTGTTCCTCCCATCTAG         | 235458-235436         | 22 | 76                       |
| 26-for | ACACAGTAGCTGTCCTTGTCTGACA | 240006-240030         | 24 | 26-rev | AGACACCCACAACAGCCAATG         | 240080-240060         | 20 | 75                       |
| 27-for | GCTGTTGATGAGCAAATCTTTGG   | 243523-243545         | 22 | 27-rev | CAGGCAGTTCATGATTCAACCA        | 243597-243576         | 21 | 75                       |
| 28-for | GGTTCAGGTGGGTGCTCATCT     | 247986-248006         | 20 | 28-rev | CAGAAGGCAAAGCCCCATTAC         | 248061-248041         | 20 | 76                       |
| 29-for | GAGGCTCAGCCCTGTGATCTT     | 260247-260267         | 20 | 29-rev | GCAGCCTCACTTGGAGGTTCT         | 260321-260301         | 20 | 75                       |
| 30-for | TGATTGGCAGAAACGCAACTAA    | 273302-273323         | 21 | 30-rev | CACCATTTTGAAGCCTGTGGAA        | 273395-273375         | 20 | 94                       |
| 31-for | AGCGTCCATCACTGCTTCTG      | 285655-285675         | 20 | 31-rev | TCCCCTTCCATTATGAGCAGTCT       | 285735-285713         | 22 | 81                       |
| 32-for | CAGGGCTCCTATCTCAGGAAGAC   | 289920-289942         | 22 | 32-rev | GCACAGTTCTGTTTGTCCAATCC       | 290002-289980         | 22 | 83                       |
| 33-for | GGCCTCCTGCCTGTTGCT        | 297604-297623         | 19 | 33-rev | GCCAGAACCTCCTCATAAACTCA       | 297662-297639         | 23 | 59                       |
| Chr 15 |                           |                       |    | Chr 15 |                               |                       |    |                          |
| B2M    | TCTGCTGCGGCTCTGCTTC       | 44712081-44712099     | 19 |        | GGTGCTAGGACATGCGAACTTAG       | 44712161-44712139     | 23 | 80                       |

B2M:  $\beta$ 2 microglobulin

Table S2: Primers for the long-range PCR for the definition of breakpoints of the new deletions.

| Primer name                   | Sequence                            | Position on chr 16 | PCR length (bp) |
|-------------------------------|-------------------------------------|--------------------|-----------------|
| Long-range PCR for the --(PA) |                                     |                    |                 |
| 7-for                         | 5'-CAGTGTGGCAGCGTTGAGA-3'           | 146054-146072      | 501             |
| A-rev                         | 5'-GCGCTCAATCTCCGACAGCTCCGA-3'      | 180344-180321      |                 |
| Long-range PCR for the --(AG) |                                     |                    |                 |
| B-for                         | 5'-TATGGATCCCTAACCCCTGACCCTAACCC-3' | telomeric          | 522             |
| C-rev                         | 5'-GGCCTGACCTACCTTCTTGAAG-3'        | 285027-285006      |                 |
| Long-range PCR for the --(FG) |                                     |                    |                 |
| D-for                         | 5'-GCTGAGGGAACACAGCTACATCTACA-3'    | 170978-171003      | ~2.600          |
| 14-rev                        | 5'-CATCCTGTCCCCCGTGTCT-3'           | 185673-185655      | ~2.600          |
| 9-for                         | 5'-TCCCCTGCATCCCTTTCAG-3'           | 171090-171108      |                 |
| 14-rev                        | 5'-CATCCTGTCCCCCGTGTCT-3'           | 185673-185655      | ~1.400          |
| 9-for                         | 5'-TCCCCTGCATCCCTTTCAG-3'           | 171090-171108      |                 |
| E-rev                         | 5'-CCACCTTTGCCTCCTGCAC-3'           | 184453-184435      |                 |
